Functional resilience to disturbance

## Historical forest disturbance results in variation in functional resilience of seed dispersal mutualisms

**Authors:** <sup>1,2</sup> Carmela M. Buono, <sup>1</sup> Jesse Lofaso, <sup>1</sup> Will Smisko, <sup>1</sup> Carly Gerth, <sup>1</sup> John Santare, <sup>1</sup> Kirsten M. Prior

<sup>1</sup> Binghamton University, Department of Biological Sciences, NY, United States.

<sup>2</sup> **Corresponding author:** Carmela M. Buono ([cbuono1@binghamton.edu](mailto:cbuono1@binghamton.edu))

### 1 Abstract

2 Mutualistic interactions provide essential ecosystem functions, such as promoting and  
3 maintaining diversity. Understanding if functionally important mutualisms are resilient (able to  
4 resist and recover) to anthropogenic disturbance is important to understand the capacity for  
5 diversity to recover. Animal-mediated seed dispersal supports plant population growth and  
6 community structure, and disturbance of this function can threaten plant diversity and contribute  
7 to low resiliency. Ant-mediated seed dispersal mutualisms are particularly sensitive to  
8 anthropogenic disturbance, as they rely on one to a few high-quality dispersal partners. In North  
9 American eastern deciduous forests (NAEDF), ants in the genus *Aphaenogaster* are “keystone  
10 dispersers” of 30-40% of understory forbs adapted to dispersal by ants (myrmecochores). The  
11 majority of present day NAEDF have regenerated from previous disturbance in the form of  
12 historical land use change (HLUC), due to clearing for agriculture. Previous studies have  
13 revealed that myrmecochore diversity is not resilient to HLUC. Here, we ask if seed dispersal  
14 mutualisms are resilient to HLUC and if decreases in mutualistic interactions with partners,  
15 *Aphaenogaster* sp., or increases in antagonistic interactions cause degradation of function. In a  
16 large-scale natural experiment (20 sites), we measured seed removal, the abundance of  
17 mutualistic partners and other invertebrates interacting with seeds, myrmecochore cover and  
18 diversity, along with ant habitat and forest structure. We found lower and more variable seed  
19 removal in secondary forests compared to remnant forests. A path analysis of all forests revealed  
20 that abundance of mutualists was the primary determinant of variation in seed removal, and that  
21 seed damage by antagonists (invasive slugs) negatively affected dispersal and was higher in  
22 secondary forests. In a path analysis of remnant forests, the link between mutualist abundance  
23 and seed removal was absent, but present in the secondary forest path, suggesting that seed  
24 dispersal is more variable and dependent on mutualist abundance in secondary forests and is  
25 stable and high in remnant forests. Here we show that functional resilience to HLUC is variable  
26 and may impede recovery of understory plant communities. This work provides key insights on  
27 the effects of anthropogenic disturbance on mutualistic interactions and how the resilience of  
28 critical ecosystem functions impacts diversity resiliency.

29  
30 **Keywords:** land use change, seed dispersal, mutualism, myrmecochory, resilience, ecosystem  
31 function, *Aphaenogaster*, *Arion*, ants, animal–plant interaction, deciduous forests

### 32 Introduction

34 Mutualistic interactions provide essential ecosystem functions and contribute to the  
35 maintenance of diversity in ecosystems (Goheen & Palmer 2010; Prior et al. 2015; Kaiser-  
36 Bunbury et al. 2017; Wandrag et al. 2017). Understanding if mutualistic interactions are

37 functionally resilient (able to resist and recover) to anthropogenic disturbances will reveal if  
38 diversity benefitting from interactions has the capacity for recovery (Oliver et al. 2015; Kaiser-  
39 Bunbury et al. 2017; Rogers et al. 2017). Shifts in anthropogenic land use leave ecosystems to  
40 naturally regenerate from wide-scale disturbance, and variation in legacies may prevent or alter  
41 recovery trajectories, leading to reduced or altered interactions and diversity (Holling 1973;  
42 Suding et al. 2004; Sabatini et al. 2014; Kaiser-Bunbury et al. 2017). Whether or not functionally  
43 important mutualistic interactions are resilient to anthropogenic disturbance is an open question  
44 necessary to uncover the capacity for recovery of diversity in ecosystems.

45 Animal-mediated seed dispersal is a functionally important mutualism (Schupp 1993;  
46 Ness et al. 2009; Rogers et al. 2017; Wandrag et al. 2017), where plants benefit from having a  
47 dispersal agent that increases dispersal distance from maternal plants, protection from seed  
48 predators, and directed dispersal to more favorable location (Tiffney & Mazer 1995; Kalisz et al.  
49 1999; Wenny 2001; Bronstein et al. 2006; Giladi 2006). Animal-mediated seed dispersal benefits  
50 restoration, given its positive role in plant population growth and distribution (Wunderle 1997;  
51 da Silva et al. 2015; De Almeida et al. 2020), and uncovering if seed dispersal is resilient post  
52 disturbance can better inform restoration planning.

53 Myrmecochory, or ant-mediated seed dispersal, is a widespread dispersal syndrome,  
54 including ~11,000 plant species worldwide (Lengyel et al. 2009). Myrmecochorous plants are  
55 adapted to dispersal by ants, having a lipid-rich appendage (elaiosome) that attracts ants and  
56 provides a food reward. Myrmecochory is a particularly specialized diffuse mutualism, with one  
57 or a handful of ant species dispersing most seeds (Bronstein et al. 2006; Giladi 2006; Gove et al.  
58 2007; Manzaneda & Rey 2009; Ness et al. 2009; Warren et al. 2014). Asymmetrical diffuse  
59 mutualisms are sensitive to anthropogenic disturbance, as changes in the presence, abundance,  
60 and interaction of effective animal disperser partners can disrupt interactions (Schupp 1993;  
61 Traveset & Richardson 2006; Schleuning et al. 2011; Prior et al. 2015), with cascading impacts  
62 on plant communities (Christian 2001; Prior et al. 2015; Rogers et al. 2017).

63 North American eastern deciduous forests (NAEDF) are a myrmecochory hotspot  
64 (Lengyel et al. 2009) with 30-40% of understory forbs possessing elaiosomes (Beattie & Culver  
65 1981; Handel et al. 1981). High-quality dispersers find seeds quickly, do not harm seeds, and  
66 deposit seeds outside of nests (Giladi 2006; Canner et al. 2012; Prior et al. 2014; Prior et al.  
67 2015; Gordon et al. 2019; Meadley Dunphy et al. 2020). Poor-quality dispersers interact with  
68 seeds but fail to disperse seeds and might damage seeds (Christian 2001; Bronstein et al. 2006;  
69 Giladi 2006; Stuble et al. 2011; Warren & Giladi 2014; Parker et al. 2021). In NAEDF, ants  
70 belonging to the genus *Aphaenogaster* are considered "keystone" dispersers, responsible for  
71 majority of dispersal events (Ness et al. 2009).

72 NAEDF are impacted by various types of anthropogenic disturbances (Reich & Frelich  
73 2002). Most contemporary forests are secondary, having passively regenerated from historical  
74 clearing for agriculture or timber harvesting (Flinn & Vellend 2005; Flinn & Marks 2007).  
75 Herbaceous understory communities are not resilient to historical clearing with secondary forests  
76 lacking diversity, especially of myrmecochores, (Bellemare et al. 2002; Mitchell et al. 2002;  
77 Flinn & Vellend 2005; Griffiths & McGee 2018). Several factors likely contribute to low  
78 resiliency, including recruitment limitation to secondary fragments from source populations  
79 (Flinn & Vellend 2005). Agricultural disturbances leave legacy effects in soils that impact  
80 herbaceous plants such as elevated pH and nutrients and lower organic matter (Koerner et al.  
81 1997; Dyer 2010). Less is known about whether functionally important interactions, such as seed

82 dispersal, are resilient to historical land use change (HLUC) and if reduced function contributes  
83 to low understory recovery (except see Mitchell et al. 2002; Kiel et al. 2020; Parker et al. 2021).

84 Reduction in ant partner presence, abundance, or interactions could slow understory  
85 recovery in secondary forests (Mitchell et al. 2002; Kiel et al. 2020; Parker et al. 2021). It is well  
86 established that *Aphaenogaster* presence and abundance positively influences seed dispersal,  
87 distribution and community structure of myrmecochores (Kalisz et al. 1999; Ness et al. 2009;  
88 Warren & Giladi 2014; Prior et al. 2015). One way in which myrmecochory may not be resilient  
89 to HLUC is if the keystone mutualist, *Aphaenogaster*, are absent or have lower abundances.  
90 Prior clearing or soil disturbance could reduce *Aphaenogaster* abundance, and recovery from  
91 populations in intact forests could be limited (Schmidt et al. 2013). Ant abundance in secondary  
92 forests could also be negatively impacted by changes to forest floor conditions, including altered  
93 canopy structure influencing soil microhabitat (Warren et al. 2012), or altered leaf litter and  
94 woody debris, which provides ant nesting habitat (Lubertazzi 2012).

95 Myrmecochory might also not be resilient to HLUC if there is an increase in organisms  
96 that interact antagonistically with *Aphaenogaster* or seeds. *Aphaenogaster* is generally  
97 subordinate to other ant species and competition with other ants could reduce *Aphaenogaster*  
98 abundance (Ness 2004; Warren et al. 2020; Parker et al. 2021). Other ants in NAEDF are lower  
99 quality dispersers that fail to disperse seeds or harm seeds (Ness et al. 2004; Giladi 2006;  
100 Rodriguez-Cabal et al. 2012; Parker et al. 2021). If secondary forest conditions favor other ant  
101 species, they could disrupt seed dispersal directly by harming seeds, failing to disperse seeds,  
102 moving them short distances, or indirectly by competing with *Aphaenogaster* and reducing their  
103 effectiveness (Ness 2004; Leal et al. 2015; Parker et al. 2021). Finally, other invertebrate  
104 organisms interact with myrmecochore seeds and could affect dispersal (Gunther & Lanza 1989;  
105 Jules 1998). For example, in NAEDF, the invasive slug, *Arion subfuscus*, occurs in disturbed  
106 forest habitats, such as forest edges, and damage myrmecochorous seeds by robbing elaiosomes  
107 and preventing dispersal (Meadley Dunphy et al. 2016; Kiel et al. 2020; Parker et al. 2021).

108 Here, we examine if seed dispersal mutualisms are resilient to wide-scale disturbances  
109 resulting from historical land use change (HLUC). In particular, we ask whether seed dispersal is  
110 lower in secondary forests compared to remnant forests, and if so, whether decreases in  
111 interactions with mutualistic partners or increases in antagonistic interactions contributes to  
112 degradation of function. We conducted a natural experiment in 20 paired remnant and secondary  
113 forests, where we compared seed dispersal of myrmecochorous seeds, along with myrmecochore  
114 cover and diversity. To uncover how abundances of organisms interacting with seeds affects  
115 variation in dispersal, we measured the abundance of the keystone disperser, along with other  
116 invertebrates (ants, slugs) interacting with seeds. We also measured several forest structure and  
117 ant habitat factors (canopy cover, ant nesting sites, and abiotic factors) and performed a path  
118 analysis to reveal how forest conditions affect the abundance of mutualistic and antagonistic  
119 organisms interacting with seeds and seed dispersal. We predict that seed dispersal will not be  
120 resilient to HLUC and be lower in secondary forests due to lower abundance or fewer  
121 interactions with mutualists or increased abundance or interactions with antagonists. We also  
122 predict a disruption in seed dispersal mutualisms may relate to lower myrmecochore diversity  
123 and cover in secondary forests. Better understanding the effects of anthropogenic disturbance on  
124 this critical mutualistic interaction, in particular its effect on mutualists and antagonists, provides  
125 key insights into the functional resiliency of mutualisms, and its influences on the resiliency of  
126 diversity. Understanding resiliency of seed dispersal mutualisms has important implications for  
127 restoring understory herbaceous plant communities.

## 128 **Materials and Methods**

### 129 Study sites

130 We conducted this study across 20 paired sites in mesic hardwood forests in NAEDF.  
131 Each pair of sites included a remnant forest site (no history of clear cutting for agriculture  $\geq 150$   
132 years) and a secondary site (regenerated from agricultural use (clear cut for pasture or plowing)  
133 50-75 years). Remnant sites were located and verified using historic maps, aerial photographs,  
134 literature references, management reports, and land manager interviews (see details in Appendix  
135 S1). To mirror topographic conditions in the remnant sites, we selected secondary sites adjacent  
136 to or geographically close (within 32 km) to remnant sites. We grouped sites into three  
137 ecoregions (E1-E3) to account for regional variation (Appendix S1: Fig. S1).

138 At each study site, we set up three 50 m survey transects away from forest edges ( $> 100$   
139 m). Transects averaged 80 m from each other and were placed in areas with at least  $\sim 75\%$   
140 deciduous tree cover. We created 5 m<sup>2</sup> survey plots that alternated along transects with different  
141 plot types: seed removal, invertebrate community, and abiotic characteristic plots; vegetation  
142 plots; and ant habitat plots (Appendix S1: Fig. S2).

143

### 144 Study system and species

145 *Aphaenogaster* are part of the *Aphaenogaster-rudis-fulva-texanus* species complex.  
146 (Umphrey 1996; Ellison et al. 2012; DeMarco & Cognato 2016). In our sites, we found *A. rudis*  
147 and *A. picea* (that are polyphyletic and challenging to delineate morphologically) and  
148 monophyletic *A. fulva* (Parker et al. 2021; Buono et al. 2022; Quartuccia & Buono, *unpublished*  
149 *data*) and refer to this group as *Aphaenogaster* sp. in our study. *Aphaenogaster* are abundant ants  
150 in NAEDF, with up to 2 nests per m<sup>2</sup>. They form single queen colonies (monogynous) with  
151 several hundred workers (Lubertazzi 2012). They are the primary dispersers of myrmecochores  
152 in NAEDF (Beattie & Culver 1981; Handel et al. 1981), including many species that we found at  
153 our sites, including *Trillium* sp., *Sanguinaria canadensis*, *Anemone acutiloba*, and *Asarum*  
154 *canadense* (Appendix S1: Table S3).

155 Other invertebrate organisms that are known to interact with myrmecochorous seeds in  
156 deciduous forests include other ant species (e.g., *Lasius americanus*, *Myrmica punctiventris*, and  
157 *Camponotus pennsylvanicus*) that are low-quality dispersers (Giladi 2006; Ness et al. 2009;  
158 Warren et al. 2015; Parker et al. 2021) (Appendix S1: Table S4). We also commonly observed  
159 the invasive slug belonging to the *Arion-subfuscus-fuscus* species complex interacting with  
160 seeds. This species complex is native to Europe and though both putative species are observed in  
161 North America, we refer to this slug as *A. subfuscus*, seeing as *A. subfuscus* is the more wide-  
162 ranging species (Pinceel et al. 2004). The slugs can be found in various habitats (forests, fields)  
163 and is a described pest, feeding on plants and fungi (Beyer & Saari 1978).

164

### 165 Seed dispersal and invertebrate organisms interacting with seeds

166 We performed seed removal trials between late June to mid July 2018-2019 on non-rainy  
167 days to test if seed removal by ants differed between remnant and secondary sites. In each site,  
168 we set up 15 seed depots in seed removal/invertebrate community plots along three transects  
169 (Appendix S1: Fig. S2). Depots were located in the center of plots and consisted of a 10 cm<sup>3</sup> petri  
170 dish placed on top of a paper index card (10x15 cm). Seeds from *A. canadense*, were collected  
171 when fruits were dehiscing from local sites. We chose *A. canadense*, as it is a common  
172 myrmecochore in this region (although not endemic to all sites; Appendix S1: Table S1) and is  
173 preferred by *Aphaenogaster* (Prior et al. 2015; Buono et al. 2022). To avoid unintentional

174 introduction, seeds were frozen at -80 °C for 24 hr. (to render seeds inviable) and then stored at  
175 21 °C. Seeds were thawed before placing them on depots and freezing is not known to impact ant  
176 interactions with seeds (Zelikova et al. 2008). On the day of the trials, we placed 8 seeds on  
177 depots. Wire mesh cages (7x12x12 cm) with 1.3 cm<sup>2</sup> holes were secured over depots to exclude  
178 rodents but allow for invertebrate access. Depots were set out in the late morning (~11:00 am) on  
179 non-rainy days. We observed depots 1/hr. for 3 hrs. During each observation, we recorded the  
180 number of seeds remaining, the presence and species of ants in depots, the type of interaction  
181 (carrying, handling), and the identification of any other invertebrates (i.e., slugs). Final  
182 observations were taken after 24 hrs., where we recorded the condition of the elaiosome (intact,  
183 partially removed, or completely scooped out), and the identification of any organisms on the  
184 depot (Meadley Dunphy et al. 2016; Parker et al. 2021).

185 We set out pitfall traps during the seed removal trials to compare *Aphaenogaster* sp.  
186 abundance, other ant abundance and diversity, and slug abundance between remnant and  
187 secondary sites. At each site we set up 30 pitfall traps (2 in each seed removal plot (Appendix  
188 S1: Fig S2)). The pitfall traps included a plastic cup (9 fluid oz., 7 cm tall, 9 cm diameter) filled  
189 with ~ 3.5 oz of soapy water (with biodegradable soap) and depressed into the soil, top level with  
190 the ground. A 5 cm<sup>2</sup> wire mesh grid with 1.3 cm<sup>2</sup> openings covered the opening of the cups.  
191 Pitfall trap surveys were conducted on non-rainy days and left out for 24 hrs. Contents of traps  
192 were preserved in 70% ethanol for identification. We pinned specimens of ant species and  
193 identified all ants to the lowest taxonomic unit using regional keys (Ellison et al. 2012).

194

#### 195 *Myrmecochore diversity and vegetation structure*

196 We conducted vegetation surveys to compare differences in myrmecochore diversity and  
197 vegetation structure between remnant and secondary sites. Surveys were designed to compare  
198 forest composition and cover at several levels (understory, shrub, tree, and canopy) (Davison &  
199 Forman 1982). We set up four 1 m<sup>2</sup> quadrats in the corners of each vegetative plot to measure  
200 herbaceous cover. We categorized plant species with seeds known to bear elaiosomes as  
201 myrmecochores and identified each to the lowest taxonomic unit (Handel et al. 1981; Bellemare  
202 et al. 2002) (Appendix S1: Table S3). In 5 m<sup>2</sup> vegetative plots, we also measured shrub cover,  
203 tree basal area, percent canopy openness and identified tree species (see details in Appendix S1).

204

#### 205 *Abiotic characteristics and potential ant habitat*

206 In seed removal plots, we measured air temperature and three soil characteristics: soil pH,  
207 moisture, and temperature during the seed removal trials (see details in Appendix S1). We  
208 surveyed three known ant habitat types (leaf litter, decaying logs, and movable rocks (i.e., not  
209 large boulders)) in three plots (Appendix S1: Fig. S2) (see details in Appendix S1). For each  
210 habitat type, we recorded the presence of ant colonies (Appendix S1: Fig. S4).

211

#### 212 *Statistical analysis*

213 We performed binomial generalized linear mixed effects models (GLMM) on the number  
214 of seeds removed by ants and damaged by slugs (total elaiosome removed) per transect at the  
215 final observation time (24 hrs.). We included forest HLUC (remnant vs. secondary) and  
216 ecoregion as fixed effects and site nested within ecoregion as a random effect to account for  
217 spatial autocorrelation. We combined counts from two pitfalls per plot and performed a negative  
218 binomial GLMM (to account for overdispersion) on *Aphaenogaster* sp. abundance, other ant  
219 abundance, ant species richness. We estimated slug abundance as the combined number of slugs

220 (or slug evidence) on seed depots and slug abundance in pitfall traps. We performed a negative  
221 binomial GLMM (to account for overdispersion) on slug abundance. Where ecoregion explained  
222 variation for main response variables (seed removal, organism abundance), we performed a  
223 Tukey's post hoc test to compare differences among regions. When there was HLUC\*ecoregion  
224 interactions, we compared remnant and secondary forests within ecoregions, performing a  
225 Bonferroni correction for multiple comparisons (Appendix S1: Table S2).

226 We performed linear mixed effects models (LMM) on percent myrmecochore cover,  
227 percent non-myrmecochore cover, shrub cover, tree basal area, and percent canopy openness at  
228 the transect level. We log-transformed (myrmecochore cover, shrub cover, and total basal area)  
229 to improve normality. We performed a negative binomial GLMM on species richness of  
230 myrmecochores at the transect level. Finally, we performed principal component analyses (PCA)  
231 on myrmecochore presence both at the site ( $PCA_{S,myrmec}$ ) and transect level ( $PCA_{T,myrmec}$ ) and  
232 performed LMMs on  $PC1_{T,myrmec}$  and  $PC2_{T,myrmec}$ . Where ecoregion explained variation for  
233 myrmecochore richness and  $PC1_{T,myrmec}$ , we performed a Tukey's post hoc test to compare  
234 differences among regions. When there was HLUC\*ecoregion interactions, we compared  
235 remnant and secondary forests within ecoregions, performing a Bonferroni correction for  
236 multiple comparisons (Appendix S1: Table S2).

237 We also performed LMMs on soil pH, moisture, temperature and on average air  
238 temperature at the transect level. We performed LMMs on rock surface area, leaf volume, and  
239 log volume, performing log-transformations on log volume and rock area.

240 To determine how organisms interacting with seeds and habitat factors influence  
241 observed variance in seed removal (See *Results*, Fig. 1), we performed path analyses. We  
242 constructed an *a priori* model with hypothesized pathways determined by known ecological  
243 interactions that included direct interactions between invertebrate organisms potentially  
244 interacting with seeds (*Aphaenogaster* sp., other ants, and slugs) and seed removal (Appendix  
245 S1: Fig. S5). We included direct interactions between "habitat" factors and the abundance of  
246 organisms interacting with seeds, and an indirect interaction between habitat and seed removal.  
247 We included direct interactions between other ants and *Aphaenogaster* sp. as other ants can  
248 affect seed dispersal if they interact antagonistically with *Aphaenogaster* sp. (Ness 2004; Warren  
249 et al. 2020). To maintain path analysis power, we created a composite habitat metric.

250 To create a composite habitat metric, we performed a correlation analysis among  
251 standardized variables representing forest structure, abiotic factors, ant habitat factors, organisms  
252 interacting with seeds (*Aphaenogaster* sp., other ant, and slug abundance), and seed dispersal  
253 (Appendix S1: Fig. S8). We performed a PCA on habitat factors with significant correlations to  
254 organisms and dispersal.  $PC_{DM,hab}$  was the first component and explained 35.4 percent of  
255 variation, and we used this component as the composite metric (Appendix S1: Fig. S10).  
256 Similarly, we ran seed dispersal path analyses separately for remnant forests and secondary  
257 forests and created composite habitat metrics for each ( $PC_{DR,hab}$  and  $PC_{DS,hab}$ ). We ran path  
258 analyses on myrmecochore cover for the combined dataset and separately for remnant and  
259 secondary forests (Appendix S1: Fig. S6). Myrmecochore cover was not significantly correlated  
260 with seed removal (see details in Appendix S1).

261 We used R for all analyses, including the following packages: MASS, lme4, stats,  
262 corrplot, lavaan, semplot, ggbiplot (Venables & Ripley 2002; Vu 2011; Rosseel 2012; Bates et  
263 al. 2015; Epskamp 2019; R Core Team 2021; Wei & Simko 2021).

264  
265

## 266 **Results**

### 267 Seed removal and invertebrate organisms interacting with seeds

268 The number of seeds removed from depots was significantly higher in remnant forests  
269 compared to secondary forests ( $P < 0.001$ , Fig. 1A; see full statistical table, Appendix S1: Table  
270 S2). During the seed removal trials, the majority ( $> 90\%$ ) of ants removing seeds was  
271 *Aphaenogaster* sp. We also observed 9 ant species interacting with (but not removing) seeds  
272 (Appendix S1: Table S4). At 7 sites, we found *Nylanderia flavipes* (invasive ant) removing  
273 pieces of elaiosomes from seeds. The other main organism on depots was *A. subfuscus*, that fully  
274 scoops out elaiosomes, while not dispersing seeds (Meadley Dunphy et al. 2016).

275 In the pitfall traps, *Aphaenogaster* sp. abundance did not differ between forest HLUC  
276 type ( $P = 0.115$ ; Fig. 1C). The abundance of other ant species also did not differ, but there was a  
277 trend for higher mean abundances in secondary forests ( $P = 0.057$ ; Fig. 1D). We found 37 ant  
278 species, with no difference in richness between remnant and secondary forests ( $P = 0.783$ ;  
279 Appendix S1: Table S2). Slug abundance was higher in secondary forests ( $P = 0.0025$ ; Appendix  
280 S1: Table S2). We also found the number of seeds remaining with their elaiosome fully removed  
281 (due to slug damage) was higher in secondary forests ( $P = 0.0176$ ; Fig. 1B). We observed  
282 variation in seed removal, ant richness, and ant abundance among regions but no variation in  
283 slug abundance (Appendix S1: Table S2).

284

### 285 Myrmecochore diversity and vegetation structure

286 We found 28 myrmecochore species (Appendix S1: Table S3), with total myrmecochore  
287 cover ( $P = 0.0316$ ; Fig. 3A) and myrmecochore species richness being lower in secondary forests  
288 ( $P = 0.0041$ ; Fig. 3B). In the site level myrmecochore PCA, we found  $PC1_{S.myrmec}$ , accounted for  
289 25.3% of variance with more forest indicator species at remnant sites, including *Dicentra* sp.  
290 (including *D. cucullaria*), *Tiarella cordifolia*, *Trillium* sp. (including *T. erectum*) along with  
291 nonsignificant indicator species *Anemone acutiloba* and *Claytonia caroliniana* (Appendix S1:  
292 Table S3).  $PC2_{S.myrmec}$  accounted for 16.1% of variance and was influenced by indicator species  
293 *T. grandiflorum*, *T. undulatum*, and *Uvularia sessilifolia* (Griffiths & McGee 2018) (Fig. 2). We  
294 found a difference in  $PC1_{T.myrmec}$  by forest HLUC ( $P = 0.0328$ ; Appendix S1: Table S2), but  
295  $PC2_{T.myrmec}$  did not differ between forest HLUC (Appendix S1: Fig. S3). Canopy openness was  
296 higher in secondary forests ( $P = 0.0084$ ; Fig. 3C), but there were no differences in shrub cover,  
297 non-myrmecochore herbaceous understory cover, or tree basal area between forest types  
298 (Appendix S1: Table S2). There were ecoregion effects for myrmecochores, with myrmecochore  
299 richness being higher in E3 than in E1 and E2 (Fig 3B; Appendix S1: Table S2).

300

### 301 Abiotic characteristics and potential ant habitat

302 We did not find differences in average soil temperature, soil pH, soil moisture, or air  
303 temperature between HLUC (Appendix S1: Table S2). We also found no differences in leaf litter  
304 volume, log volume, or rock surface area between HLUC (Fig. 3D). Across both types of HLUC,  
305 we found a slight difference in habitat types occupied by ant colonies, preferring log over leaf  
306 litter and rock (Appendix S1: Fig. S4).

307

### 308 Path analyses and correlation analyses

309 In the combined seed dispersal path model, we found significant and positive interactions  
310 between *Aphaenogaster* sp. abundance and other ant abundance ( $0.72 \pm 0.16$ ;  $P < 0.001$ ; Fig.  
311 4A). *Aphaenogaster* sp. abundance had a significant positive effect on seed removal ( $0.47 \pm$

312 0.16;  $P < 0.01$ ) and slug abundance had a significant negative effect ( $-0.36 \pm 0.11$ ;  $P < 0.01$ ). The  
313 abundance of other ants had no effect on seed removal (Fig. 4A).  $PC_{DM.hab}$  had a significant  
314 negative effect on the abundance of other ants ( $0.38 \pm 0.12$ ;  $P < 0.01$ ; Fig. 4A). Given the factors  
315 that contributed to  $PC_{DM.hab}$ , ant abundance is higher at sites with relatively lower soil moisture,  
316 leaf litter, and air temperature, and higher soil pH, soil temperature, and herbaceous cover (Fig.  
317 4A; Appendix S1: Fig S8). The final model was supported by the data ( $\chi^2 = 1.40$ ; d.f. = 2;  $P =$   
318 0.49). A  $P$  value  $> 0.05$  suggests the data are consistent with the hypothesized model.

319 The remnant forest path model also revealed that *Aphaenogaster* sp. abundance and other  
320 ant abundance had a significant, positive interaction ( $0.80 \pm 0.23$ ;  $P < 0.01$ ; Fig. 4B). However,  
321 in this case, the abundance of organisms had no significant direct effect on seed removal. In the  
322 remnant path,  $PC_{DR.hab}$  had significant effects on *Aphaenogaster* sp. and other ants ( $0.46 \pm 0.16$ ,  
323  $P < 0.01$ ;  $0.59 \pm 0.15$ ,  $P < 0.001$ ; Fig. 4B), again with soil conditions (lower moisture and higher  
324 temperature) influencing ant abundance (Appendix S1: Fig. S8). The secondary forest path  
325 model revealed that *Aphaenogaster* sp. abundance had a direct positive effect on seed removal  
326 ( $0.39 \pm 0.15$ ;  $P < 0.05$ ; Fig. 4C), but no other interactions were significant. Secondary  $PC_{DS.hab}$   
327 had no effect on organism abundance (Fig. 4C; Appendix S1: Fig. S8). The final models were  
328 both supported by the data ( $\chi^2 = 1.01$ , d.f. = 2,  $P = 0.60$ ;  $\chi^2 = 1.98$ , d.f. = 2,  $P = 0.37$ ). The  
329 combined and separate path analyses showed weak effects of organisms' abundance and habitat  
330 factor impacts directly on myrmecochore cover (Appendix S1: Fig S6). However, our correlation  
331 analysis shows significant positive effect of soil pH and other herbaceous (non-myrmecochore)  
332 cover on myrmecochore cover in the combined and remnant forests, but not the secondary  
333 forests (Appendix S1: Fig. S9).

334

## 335 Discussion

336 Our work shows that seed dispersal by ants, a vital ecosystem function in NAEDF  
337 ecosystems, is partially resilient to disturbances from HLUC with variation in recovery  
338 trajectories. Secondary forests had lower and more varied rates of seed dispersal than remnant  
339 forests, resulting from altered interactions with mutualists and antagonists. High-quality  
340 mutualists, *Aphaenogaster* sp., were the primary dispersers of seeds and variation in their  
341 abundance contributed to variation in seed dispersal. Other ant species did not affect seed  
342 dispersal, but invasive slugs were more abundant and slug-induced seed damage more prevalent  
343 in secondary forests, with a negative relationship between slug abundance and seed dispersal.  
344 Interestingly, variation in *Aphaenogaster* sp. abundance did not influence seed dispersal in  
345 remnant forests (only in secondary forests), suggesting that seed dispersal function is stable in  
346 remnant forests, but variable in secondary forests, where dispersal quality is dependent on  
347 *Aphaenogaster* sp. abundance. Myrmecochore cover and richness was lower in secondary  
348 forests, but not influenced by *Aphaenogaster* sp. abundance. Taken together, secondary forests  
349 vary in functional resilience, where dispersal is reduced in some forests with low mutualist  
350 abundance, but intact where mutualists are abundant. While variation in functional resilience  
351 may not be a direct mechanism of low recovery of myrmecochory diversity in secondary forests,  
352 animal-mediated seed dispersal, including myrmecochory, is known to be important for plant  
353 fitness, distribution, and community structure (Kalisz et al. 1999; Canner et al. 2012; Prior et al.  
354 2015). As result, functional resilience of seed dispersal interactions should be considered when  
355 restoring myrmecochore communities.

356 We predicted that seed dispersal would be lower in secondary forests due to lower  
357 abundances of mutualistic partners, *Aphaenogaster*. While we found lower rates of seed dispersal



358 in secondary forests, *Aphaenogaster* sp. was present in all forests, with no difference in  
359 abundance between HLUC. This suggests that *Aphaenogaster* are somewhat resilient to  
360 widespread forest clearing. Similarly, previous work found no difference in abundances of  
361 *Aphaenogaster* between forests of differing HLUC (Mitchell et al. 2002; Kiel et al. 2020).  
362 Despite finding no difference, variation in *Aphaenogaster* sp. abundance was the primary  
363 determinant of seed dispersal variation in all forests. Interestingly, the sensitivity of seed  
364 dispersal to mutualist abundance differed between remnant and secondary forests. In remnant  
365 forests, seed dispersal variation was not influenced by *Aphaenogaster* sp. abundance, but  
366 dispersal in secondary forests was sensitive to changes in *Aphaenogaster* sp. abundance. These  
367 different relationships suggest that seed dispersal function is stable and intact in remnant forests,  
368 but variable in secondary forests, with high dispersal occurring in secondary forest patches with  
369 high *Aphaenogaster* sp. abundance.

370 In our combined and remnant seed dispersal path analysis, we found an effect of habitat  
371 conditions on other ant and *Aphaenogaster* sp. abundance. Our findings support previous studies  
372 that show that *Aphaenogaster* distribution is determined by microhabitat conditions, specifically  
373 that they do not occupy soil with high moisture (Warren et al. 2010; 2011; 2012). In secondary  
374 forests, *Aphaenogaster* sp. abundance was not influenced by habitat variation. This could be due  
375 to greater microhabitat homogenization, a legacy of widespread forest clearing (Flinn & Marks  
376 2007). Additionally, variation in nest disturbance or recolonization ability from local source  
377 populations may be more important in influencing abundance than microhabitat conditions.

378 We also predicted variation in antagonists would influence seed dispersal and found  
379 higher abundances of *A. subfuscus*, and higher rates of slug-caused seed damage in secondary  
380 forests. In the combined path analysis, we found a negative relationship between slugs and seed  
381 dispersal. Elaiosome removal by slugs decreases dispersal by ants by removing the attractive  
382 food reward and disrupting the interaction (Meadley Dunphy et al. 2016). Slugs might be more  
383 abundant in secondary forests if they have increased access through forest fragmentation and  
384 proximity to other habitats, like old fields (Beyer & Saari 1978; Kozłowski 2009). In a previous  
385 study, we found higher slug abundances and elaiosome damage at forest edges than in forest  
386 interiors (Parker et al. 2021). Slug abundance might also be higher in secondary forests due to  
387 changes in environmental conditions, but we found few consistent differences in microhabitat  
388 conditions between HULC. We found no effect of habitat factors on slug abundances in our path  
389 analyses, but soil temperature had a positive correlation with slug abundance, and there was a  
390 negative relationship with soil moisture (Appendix S1: Fig. S8). Future studies investigating the  
391 mechanisms leading to increased slug presence in secondary forest would be useful, especially  
392 when considering restoring understory plants reliant on seed dispersal mutualisms.

393 In all of our path analyses, other ant species (species other than *Aphaenogaster* sp.)  
394 abundance did not have a direct effect on seed dispersal but had a strong positive interaction with  
395 *Aphaenogaster* sp. abundance. This suggests that overall, other ant species do not have a direct  
396 antagonistic interaction with seeds or mutualist partners. This is an interesting finding, as it is  
397 generally predicted that other ants negatively affect dispersal directly (by being antagonistic or  
398 low quality partners) or indirectly by outcompeting the good disperser (Ness 2004; Giladi 2006;  
399 Ness et al. 2009; Prior et al. 2020; Parker et al. 2021). Habitat factors in both the combined and  
400 remnant path analysis influenced other ant species abundance, which suggests that the other ant  
401 species were more abundant in microhabitats that also favored *Aphaenogaster* sp.. During the  
402 seed removal trials, we only observed two other ant species interacting with, but not removing,  
403 seeds: the native species *Lasius americanus* and the invasive species *Nylanderia flavipes*, with

404 the latter occurring at high abundances and removing parts of elaiosomes. Taken together, other  
405 ants do not seem to be largely antagonistic, but also do not always contribute to seed dispersal  
406 function.

407 Previous work examining HLUC on myrmecochory in NAEDF found that patch size and  
408 historical land use intensity influences ant community abundance and composition (Mitchell et  
409 al. 2002). While this previous study found little effect of HLUC on *Aphaenogaster* abundance,  
410 they did not quantify how the abundance or presence of ants directly affected seed dispersal  
411 function. More recent work directly assessing seed removal by ants in forests that differed in  
412 HLUC demonstrated that rates of removal did not differ (Kiel et al. 2020). While this work  
413 contributes to our understanding of HLUC effects on ant-mediated seed dispersal, it was limited  
414 in spatial scope, not accounting for variation at the landscape level, with only three forests in a  
415 narrow portion of the range of this mutualism. Here, we covered a larger portion of this  
416 mutualism's range and in doing so demonstrated variation in functional resilience at the  
417 landscape level. We also found ecoregion effects on ant abundances, forest structure, and abiotic  
418 factors which could contribute to variation in functional resilience across space. To this end our  
419 study does not contradict either previous study, rather our increased scale and direct  
420 measurement of seed dispersal function expands the scope, revealing variation in functional  
421 resilience despite *Aphaenogaster* being present in secondary forests.

422 We found that total myrmecochore cover and richness were lower in secondary sites.  
423 This finding is similar to previous work that finds lower abundances of myrmecochore species in  
424 forests that have been previously cleared (Bellemare et al. 2002; Mitchell et al. 2002; Vellend  
425 2005; Griffiths & McGee 2018). In our myrmecochore PCA, myrmecochore species composition  
426 differed between secondary and remnant forests. Remnant forests had more cover and species  
427 richness, and particularly higher presence and abundance of specific remnant forest indicator  
428 species (Griffiths & McGee 2018). We found that myrmecochore cover was not influenced by  
429 *Aphaenogaster* sp. abundance in our combined path analysis and that myrmecochore cover and  
430 seed dispersal is not significantly correlated. This suggests that factors other than ant mutualists  
431 and seed dispersal are contributing to variation in myrmecochore cover. Habitat factors such as  
432 soil pH, nutrient availability, and organic matter content are all known to be altered by forest  
433 clearing and agricultural disturbances and could be contributing to lower myrmecochore cover in  
434 secondary forests (Koerner et al. 1997; Dyer 2010). However, we found no difference in soil  
435 characteristics between forests with different HLUC which suggests soil resilience in some  
436 disturbed forests. We found secondary forests had higher canopy openness, which could impact  
437 other abiotic factors that contribute to myrmecochore cover such as light availability. Other  
438 studies suggest that low myrmecochore richness and cover may also be affected by recruitment  
439 limitation from source populations (Bellemare et al. 2002; Flinn & Vellend 2005).

440 One consideration in our study is that forests varied in myrmecochore cover, which could  
441 affect seed dispersal. For example, *Aphaenogaster* colonies are known to become satiated with  
442 myrmecochorous seeds (Heithaus et al. 2005), and forests with more myrmecochores could mean  
443 that ants forage less for seeds. However, we found no relationship between myrmecochore cover  
444 and seed dispersal. Another source of variation we did not account for, is that we pooled  
445 *Aphaenogaster* species given that they are challenging to tell apart in the field. Emerging work,  
446 including our own, suggests that mutualistic partner identity (among *Aphaenogaster* putative  
447 species and populations) can affect seed dispersal function (Warren & Bradford 2014; Prior et al.  
448 2015; Meadley Dunphy et al. 2020; Prior et al. 2020; Buono et al. 2022). Also, we controlled for

449 rodent impacts on seed dispersal, but variation in this antagonistic interaction could also be  
450 contributing to how HLUC affects this mutualism (Ness & Morin 2008).

451 Variation in legacy effects and resilience can cause variable recovery trajectories, making  
452 predicting resiliency or trying to reverse impacts of disturbances difficult and complex (Suding  
453 et al. 2004). Specifically for ant-mediated seed dispersal in NAEDF, while mutualist ant partners  
454 are present in secondary forests, suggesting some level of resilience, there is variation in their  
455 abundance and function. Other studies show variation in the resiliency of diversity post  
456 disturbance (Steadman 1997; Elmquist et al. 2002; Sabatini et al. 2014), but less is known about  
457 the resiliency of functionally important interactions that diversity relies on (Oliver et al. 2015,  
458 (Mitchell et al. 2002; Kaiser-Bunbury et al. 2017; García et al. 2018). Uncovering how  
459 interactions that species rely on are resilient to disturbance is critical to understand mechanisms  
460 of slow recovery or predict if functions will be intact for proposed active restoration.

461 Our research provides implications for restoration efforts. First, we emphasize the  
462 importance of preserving remaining remnant forest ecosystems to provide critical source  
463 populations for recovery. Second, given that not all secondary forests are resilient to historical  
464 forest clearing suggests that forest patches with intact seed dispersal interactions might be  
465 prioritized for active restoration of understory plants, or there may need to be efforts to augment  
466 or enhance this interaction in some forests. While the presence of seed dispersal function and  
467 mutualistic ants do not directly determine plant community resilience, their documented  
468 importance on understory plant populations and communities means that maintenance of this  
469 function will be essential to conserving understory plant communities.

470

#### 471 **Acknowledgements**

472 We thank Shannon Meadley Dunphy, Wyatt J. Parker, Dudley Britton, and Alfonso J.  
473 Buono for help in the field and Melina Brunelli, Lena Eder, Roni Friedman, and Cassidy  
474 Robinson for help in the lab. We thank the following land managers: Rutgers, The State  
475 University of New Jersey; U.S. National Park Service; The Nature Conservancy; Pennsylvania  
476 Department of Conservation and Natural Resources; Pennsylvania Game Commission; Cornell  
477 Botanical Gardens; New York Botanic Garden Thain Family Forest; and New York City  
478 Department of Parks & Recreation. Funding came from Binghamton University (BU), BU  
479 Center for Integrated Watershed Studies (CMB), BU Provost's Scholarship (CMB) and the  
480 Torrey Botanical Society (CMB). This work was conducted on Haudenosaunee, Susquehannock,  
481 Lenni-Lenape, and Munsee Lenape ancestral lands; land that Indigenous communities were  
482 forcibly removed from. We acknowledge Indigenous peoples as the original stewards of this land  
483 and honor the lasting relationship between these nations and the land. We offer this land  
484 acknowledgement to affirm Indigenous sovereignty, history, and experiences connected with  
485 these regions, and we hope to advocate for increased Indigenous recognition within the scientific  
486 and research community.

487

488 **Author contributions:** CMB and KMP conceived the idea and designed the research; CMB,  
489 KMP, CG, and JS conducted the fieldwork; CMB, JF, WS, CG, and JS performed lab-work;  
490 CMB analyzed the data with input from KMP; CMB wrote the manuscript with input from KMP.

491 **Literature Cited**

- 492 De Almeida T, Blight O, Mesleard F, Bulot A, Provost E, & Dutoit T. 2020. Harvester ants as  
493 ecological engineers for Mediterranean grassland restoration: Impacts on soil and  
494 vegetation. *Biol Conserv.* 245(1):108547.
- 495 Bates D, Maechler M, Bolker B, & Walker S. 2015. Fitting linear mixed-effects models using  
496 “lme4.” *J Stat Softw.* 67(1):1–48.
- 497 Beattie AJ, & Culver DC. 1981. The Guild of Myrmecochores in the Herbaceous Flora of West  
498 Virginia Forests. *Ecology.* 62(1):107–115.
- 499 Bellemare J, Motzkin G, & Foster DR. 2002. Legacies of the agricultural past in the forested  
500 present: an assessment of historical land-use effects on rich mesic forests. *J Biogeogr.*  
501 29(10–11):1401–1420.
- 502 Beyer WN, & Saari DM. 1978. Activity and Ecological Distribution of the Slug, *Arion subfuscus*  
503 (*Draparnaud*) (*Stylommatophora*, *Arionidae*). *Am Midl Nat.* 100(2):359.
- 504 Bronstein JL, Alarcón R, & Geber M. 2006. The evolution of plant – insect mutualisms. *New*  
505 *Phytol.*:412–428.
- 506 Buono CM, Quartuccia G, Smisko W, Lupinski A, Radin A, Powell THQ, & Prior KM. 2022.  
507 Uncovering how behavioral variation underlying mutualist partner quality is partitioned  
508 within a species complex of keystone seed-dispersing ants. *Insectes Soc.* (in press).
- 509 Canner JE, Dunn RR, Giladi I, & Gross K. 2012. Redispersal of seeds by a keystone ant  
510 augments the spread of common wildflowers. *Acta Oecologica.* 40:31–39.
- 511 Christian CE. 2001. Consequences of a biological invasion reveal the importance of mutualism  
512 for plant communities. *Nature.* 413(6856):635–639.
- 513 Davison SE, & Forman RTT. 1982. Herb and Shrub dynamics in a mature oak forest: a thirty-  
514 year study. *Bull Torrey Bot Club.* 109(1):64–73.
- 515 DeMarco BB, & Cognato AI. 2016. A multiple-gene phylogeny reveals polyphyly among  
516 eastern North American *Aphaenogaster* species (Hymenoptera: Formicidae). *Zool Scr.*  
517 45(5):512–520.
- 518 Dyer JM. 2010. Land-use legacies in a central Appalachian forest: differential response of trees  
519 and herbs to historic agricultural practices. *Appl Veg Sci.* 13(2):195–206.
- 520 Ellison AM, Gotelli NJ, Farnsworth EJ, & Alpert GD. 2012. A field guide to the ants of New  
521 England. Yale University Press.
- 522 Elmqvist T, Wall M, Berggren A-L, Blix L, Fritioff A, & Rinman U. 2002. Tropical forest  
523 reorganization after cyclone and fire disturbance in Samoa: remnant trees as biological  
524 legacies. *Pap Knowl Towar a Media Hist Doc.* 5(2).
- 525 Epskamp S. 2019. semPlot: Path Diagrams and Visual Analysis of various SEM Packages’  
526 output. R package version 1.1.2.
- 527 Flinn KM, & Marks PL. 2007. Agricultural legacies in forest environments: tree communities,  
528 soil properties, and light availability. *Ecol Appl.* 17(2):452–463.
- 529 Flinn KM, & Vellend M. 2005. Recovery of forest plant communities in post-agricultural  
530 landscapes. *Front Ecol Environ.* 3(5):243–250.
- 531 García Y, Clara Castellanos M, & Pausas JG. 2018. Differential pollinator response underlies  
532 plant reproductive resilience after fires. *Ann Bot.* 122(6):961–971.
- 533 Giladi I. 2006. Choosing benefits or partners: a review of the evidence for the evolution of  
534 myrmecochory. *Oikos.* 112(3):481–492.
- 535 Goheen JR, & Palmer TM. 2010. Defensive Plant-Ants Stabilize Megaherbivore-Driven  
536 Landscape Change in an African Savanna. *Curr Biol.* 20(19):1768–1772.

- 537 Gordon SCC, Meadley Dunphy SA, Prior KM, & Frederickson ME. 2019. Asynchrony between  
538 ant seed dispersal activity and fruit dehiscence of myrmecochorous plants. *Am J Bot.*  
539 106(1):1010.
- 540 Gove AD, Majer JD, & Dunn RR. 2007. A keystone ant species promotes seed dispersal in a  
541 “diffuse” mutualism. *Oecologia.* 153(3):687–697.
- 542 Griffiths GR, & McGee GG. 2018. Lack of herbaceous layer community recovery in  
543 postagricultural forests across three physiographic regions of New York. *J Torrey Bot*  
544 *Soc.* 145(1):1–20.
- 545 Gunther RW, & Lanza J. 1989. Variation in Attractiveness of Trillium Diaspores to a Seed-  
546 dispersing Ant. *Am Midl Nat.* 122(2):321–328.
- 547 Handel SN, Fisch SB, & Schatz GE. 1981. Ants Disperse a Majority of Herbs in a Mesic Forest  
548 Community in New York State. *Source Bull Torrey Bot Club.* 108(4):430–437.
- 549 Heithaus ER, Heithaus PA, & Liu SY. 2005. Satiation in collection of myrmecochorous  
550 diaspores by colonies of *Aphaenogaster rudis* (Formicidae: Myrmicinae) in Central Ohio,  
551 USA. *J Insect Behav.* 18(6):827–846.
- 552 Holling C. S. 1973. Resilience and stability of ecological systems. *Annu Rev Ecol Syst.* 4(1):1–  
553 23.
- 554 Jules ES. 1998. Habitat fragmentation and demographic change for a common plant: Trillium in  
555 old-growth forests. *Ecology.* 79(5):1645–1656.
- 556 Kaiser-Bunbury CN, Mougial J, Whittington AE, Valentin T, Gabriel R, Olesen JM, & Blüthgen  
557 N. 2017. Ecosystem restoration strengthens pollination network resilience and function.  
558 *Nature.* 542(7640):223–227.
- 559 Kalisz S, Hanzawa FM, Tonsor SJ, Thiede DA, & Voigt S. 1999. Ant-mediated seed dispersal  
560 alters spatial pattern of seed relatedness in an outcrossing population of *Trillium*  
561 *grandiflorum*. *Ecology.* 80(8):2620–2634.
- 562 Kiel NG, Griffiths GR, & McGee GG. 2020. Can Disruption of an Ant-Plant Mutualism Explain  
563 a Lack of Recovery of Forest Herbs in Post-Agricultural Forests of New York? *Northeast*  
564 *Nat.* 27(2):215–228.
- 565 Koerner W, Dupouey JL, Dambrine E, & Benoit M. 1997. Influence of Past Land Use on the  
566 Vegetation and Soils of Present Day Forest in the Vosges mountains, France. *J Ecol.*  
567 85:351–358.
- 568 Kozłowski J. 2009. On the distribution and food preferences of *Arion subfuscus* (Draparnaud,  
569 1805). *Folia Malacol.* 16(2):61–67.
- 570 Leal IR, Leal LC, & Andersen AN. 2015. The benefits of myrmecochory: A matter of stature.  
571 *Biotropica.* 47(3).
- 572 Lengyel S, Gove AD, Latimer AM, Majer JD, & Dunn RR. 2009. Ants Sow the Seeds of Global  
573 Diversification in Flowering Plants. Chave J, editor. *PLoS One.* 4(5):e5480.
- 574 Lubertazzi D. 2012. The Biology and Natural History of *Aphaenogaster rudis*. *Psyche A J*  
575 *Entomol.* 2012:1–11.
- 576 Manzaneda AJ, & Rey PJ. 2009. Assessing ecological specialization of an ant–seed dispersal  
577 mutualism through a wide geographic range. *Ecology.* 90(11):3009–3022.
- 578 Meadley Dunphy SA, Prior KM, & Frederickson ME. 2016. An invasive slug exploits an ant-  
579 seed dispersal mutualism. *Oecologia.* 181(1):149–159.
- 580 Meadley Dunphy SA, Prior KM, & Frederickson ME. 2020. Invasive ants disperse seeds farther  
581 than native ants, affecting the spatial pattern of seedling recruitment and survival.  
582 *Oecologia.* 192(1):119–132.

- 583 Mitchell CE, Turner MG, & Pearson SM. 2002. Effects of Historical Land Use and Forest Patch  
584 Size on Myrmecochores and Ant Communities. *Ecol Appl*. 12(5):1364–1377.
- 585 Ness JH. 2004. Forest edges and fire ants alter the seed shadow of an ant-dispersed plant.  
586 *Oecologia*. 138:448–454.
- 587 Ness JH, Bronstein JL, Andersen AN, & Holland JN. 2004. Ant body size predicts dispersal  
588 distance of ant-adapted seeds: implications of small-ant invasions. *Ecology*. 85(5):1244–  
589 1250.
- 590 Ness JH, & Morin DF. 2008. Forest edges and landscape history shape interactions between  
591 plants, seed-dispersing ants and seed predators. *Biol Conserv*. 141(3):838–847.
- 592 Ness JH, Morin DF, & Giladi I. 2009. Uncommon specialization in a mutualism between a  
593 temperate herbaceous plant guild and an ant: Are *Aphaenogaster* ants keystone  
594 mutualists? *Oikos*. 118(12):1793–1804.
- 595 Oliver TH, Heard MS, Isaac NJB, Roy DB, Procter D, Eigenbrod F, Freckleton R, Hector A,  
596 Orme CDL, Petchey OL, et al. 2015. Biodiversity and Resilience of Ecosystem  
597 Functions. *Trends Ecol Evol*. 30(11):673–684.
- 598 Parker WJ, Buono CM, & Prior KM. 2021. Antagonistic and mutualistic interactions alter seed  
599 dispersal of understory plants at forest edges. *Ecosphere*. 12(3).
- 600 Pinceel J, Jordaens K, Van Houtte N, De Winter AJ, & Backeljau T. 2004. Molecular and  
601 morphological data reveal cryptic taxonomic diversity in the terrestrial slug complex  
602 *Arion subfuscus/fuscus* (Mollusca, Pulmonata, Arionidae) in continental north-west  
603 Europe. *Biol J Linn Soc*. 83(1):23–38.
- 604 Prior KM, Meadley Dunphy SA, & Frederickson ME. 2020. Interactions between seed-  
605 dispersing ant species affect plant community composition in field mesocosms. *J Anim  
606 Ecol*. 89(11):2485–2495.
- 607 Prior KM, Robinson JM, Meadley Dunphy SA, & Frederickson ME. 2015. Mutualism between  
608 co-introduced species facilitates invasion and alters plant community structure. *Proc R  
609 Soc B Biol Sci*. 282(1800):20142846–20142846.
- 610 Prior KM, Saxena K, & Frederickson ME. 2014. Seed handling behaviours of native and  
611 invasive seed-dispersing ants differentially influence seedling emergence in an  
612 introduced plant. *Ecol Entomol*. 39(1):66–74.
- 613 R Core Team. 2021. R: A language and environment for statistical computing. Vienna, Austria:  
614 R Foundation for Statistical Computing.
- 615 Reich PB, & Frelich L. 2002. Temperate deciduous forests. Chichester, UK: John Wiley & Sons.
- 616 Rodriguez-Cabal MA, Stuble KL, Guénard B, Dunn RR, & Sanders NJ. 2012. Disruption of ant-  
617 seed dispersal mutualisms by the invasive Asian needle ant (*Pachycondyla chinensis*).  
618 *Biol Invasions*. 14(3):557–565.
- 619 Rogers HS, Buhle ER, HilleRisLambers J, Fricke EC, Miller RH, & Tewksbury JJ. 2017. Effects  
620 of an invasive predator cascade to plants via mutualism disruption. *Nat Commun*.
- 621 Rosseel Y. 2012. lavaan: An R package for structural equation modeling. *J Stat Softw*. 48(2):1–  
622 36.
- 623 Sabatini FM, Burton JJ, Scheller RM, Amatangelo KL, & Mladenoff DJ. 2014. Functional  
624 diversity of ground-layer plant communities in old-growth and managed northern  
625 hardwood forests. *Appl Veg Sci*. 17(3):398–407.
- 626 Schleuning M, Blüthgen N, Flörchinger M, Braun J, Schaefer HM, & Böhning-Gaese K. 2011.  
627 Specialization and interaction strength in a tropical plant–frugivore network differ among  
628 forest strata. *Ecology*. 92(1):26–36.

- 629 Schmidt FA, Ribas CR, & Schoereder JH. 2013. How predictable is the response of ant  
630 assemblages to natural forest recovery? Implications for their use as bioindicators. *Ecol*  
631 *Indic.* 24(1):158–166.
- 632 Schupp EW. 1993. Quantity, quality and the effectiveness of seed dispersal by animals.  
633 *Vegetatio.* 107–108(1):15–29.
- 634 da Silva FR, Montoya D, Furtado R, Memmott J, Pizo MA, & Rodrigues RR. 2015. The  
635 restoration of tropical seed dispersal networks. *Restor Ecol.* 23(6):852–860.
- 636 Steadman DW. 1997. Extinctions of Polynesian birds: reciprocal impacts of birds and people.  
637 Yale University Press.
- 638 Stuble KL, Kirkman KL, Carroll RC, & Sanders NJ. 2011. Relative Effects of Disturbance on  
639 Red Imported Fire Ants and Native Ant Species in a Longleaf Pine Ecosystem. *Conserv*  
640 *Biol.* 25(3):618–622.
- 641 Suding KN, Gross KL, & Houseman GR. 2004. Alternative states and positive feedbacks in  
642 restoration ecology. *Trends Ecol Evol.* 19(1):46–53.
- 643 Tiffney BH, & Mazer SJ. 1995. Angiosperm growth habit, dispersal and diversification  
644 reconsidered. *Evol Ecol.* 9(1):93–117.
- 645 Traveset A, & Richardson DM. 2006. Biological invasions as disruptors of plant reproductive  
646 mutualisms. *Trends Ecol Evol.* 21(4):208–216.
- 647 Umphrey GJ. 1996. Morphometric discrimination among sibling species. (1950).
- 648 Vellend M. 2005. Land-use history and plant performance in populations of *Trillium*  
649 *grandiflorum*. *Biol Conserv.* 124(2):217–224.
- 650 Venables WN, & Ripley BD. 2002. Modern applied statistics with S. Springer, New York.
- 651 Vu VQ. 2011. ggbiplot: A ggplot2 based biplot. R package version 0.55.
- 652 Wandrag EM, Dunham AE, Duncan RP, & Rogers HS. 2017. Seed dispersal increases local  
653 species richness and reduces spatial turnover of tropical tree seedlings. *Proc Natl Acad*  
654 *Sci.*:201709584.
- 655 Warren RJ, & Bradford MA. 2014. Mutualism fails when climate response differs between  
656 interacting species. *Glob Chang Biol.* 20(2):466–474.
- 657 Warren RJ, & Giladi I. 2014. Ant-mediated seed dispersal: A few ant species (Hymenoptera:  
658 Formicidae) benefit many plants.
- 659 Warren RJ, Giladi I, & Bradford MA. 2010. Ant-mediated seed dispersal does not facilitate niche  
660 expansion. *J Ecol.* 98(5):1178–1185.
- 661 Warren RJ, Giladi I, & Bradford MA. 2012. Environmental Heterogeneity and Interspecific  
662 Interactions Influence Nest Occupancy By Key Seed-Dispersing Ants. *Environ Entomol.*  
663 41(3):463–468.
- 664 Warren RJ, Giladi I, & Bradford MA. 2014. Competition as a mechanism structuring  
665 mutualisms. Flynn D, editor. *J Ecol.* 102(2):486–495.
- 666 Warren RJ, King JR, & Bradford MA. 2020. Disentangling resource acquisition from  
667 interspecific behavioral aggression to understand the ecological dominance of a common,  
668 widespread temperate forest ant. *Insectes Soc.* 67(1):179–187.
- 669 Warren RJ, McAfee P, & Bahn V. 2011. Ecological differentiation among key plant mutualists  
670 from a cryptic ant guild. *Insectes Soc.* 58(4):505–512.
- 671 Warren RJ, McMillan A, King JR, Chick L, & Bradford MA. 2015. Forest invader replaces  
672 predation but not dispersal services by a keystone species. *Biol Invasions.* 17.
- 673 Wei T, & Simko V. 2021. R package “corrplot”: Visualization of a correlation matrix (Ver.0.90).
- 674 Wenny DG. 2001. Advantages of seed dispersal: A re-evaluation of directed dispersal. *Evol Ecol*

675 Res. 3(1):51–74.  
676 Wunderle JM. 1997. The role of animal seed dispersal in accelerating native forest regeneration  
677 on degraded tropical lands. *For Ecol Manage.* 99:223–235.  
678 Zelikova TJ, Dunn RR, & Sanders NJ. 2008. Variation in seed dispersal along an elevational  
679 gradient in Great Smoky Mountains National Park. *Acta Oecologica.* 34(2):155–162.  
680  
681



682 **Figure captions**

683

684 **Figure 1.** A) Seeds removed from depots, B) seeds with slug damage, C) *Aphaenogaster* sp.  
685 abundance, and D) other ant species abundance between remnant and secondary forests at the  
686 transect level (n = 60). Thick lines in box plots represent medians, boxes represent 1<sup>st</sup> and 3<sup>rd</sup>  
687 quartiles, whiskers represent minimums and maximums, and points represent outliers.

688

689 **Figure 2.** Myrmecochore species site level biplot of principal component analysis (PCA).  
690 Remnant transects (r) represented by green symbols and secondary (s) are tan symbols. Remnant  
691 sites are more diverse (spread out) compared to the majority of secondary sites clustered on the  
692 right side of PC1<sub>S,myrmec</sub>. PC1<sub>S,myrmec</sub> explains 25.3% of variance and PC2<sub>S,myrmec</sub> 16.1%. Black  
693 arrows represent indicator species and gray arrows nonsignificant indicator species (Griffiths &  
694 McGee 2018). Species acronyms found in Appendix S1: Table S3.

695

696 **Figure 3.** A) Myrmecochore species cover, B) myrmecochore species richness, C) canopy  
697 openness, D) log habitat volume at the transect level (n = 60) in remnant (r) and secondary (s)  
698 forests. Thick lines in box plots represent medians, boxes represent 1st and 3rd quartiles,  
699 whiskers represent minimums and maximums, and points represent outliers.

700

701 **Figure 4.** Seed dispersal path diagram with standardized path coefficients reported next to the  
702 arrows for A) all forests (combined) B) remnant forests and C) secondary forests. Green and tan  
703 solid arrows indicate significant positive and negative pathways respectively. Thickness of  
704 arrows are proportional to the standardized path coefficient's strength. Non-significant pathways  
705 with path coefficients less than 0.1 are given in dashed gray lines. Significant differences  
706 represented by symbols (\* > 0.05, \*\* > 0.01, \*\*\* > 0.001).

707

708 **Figure 1**

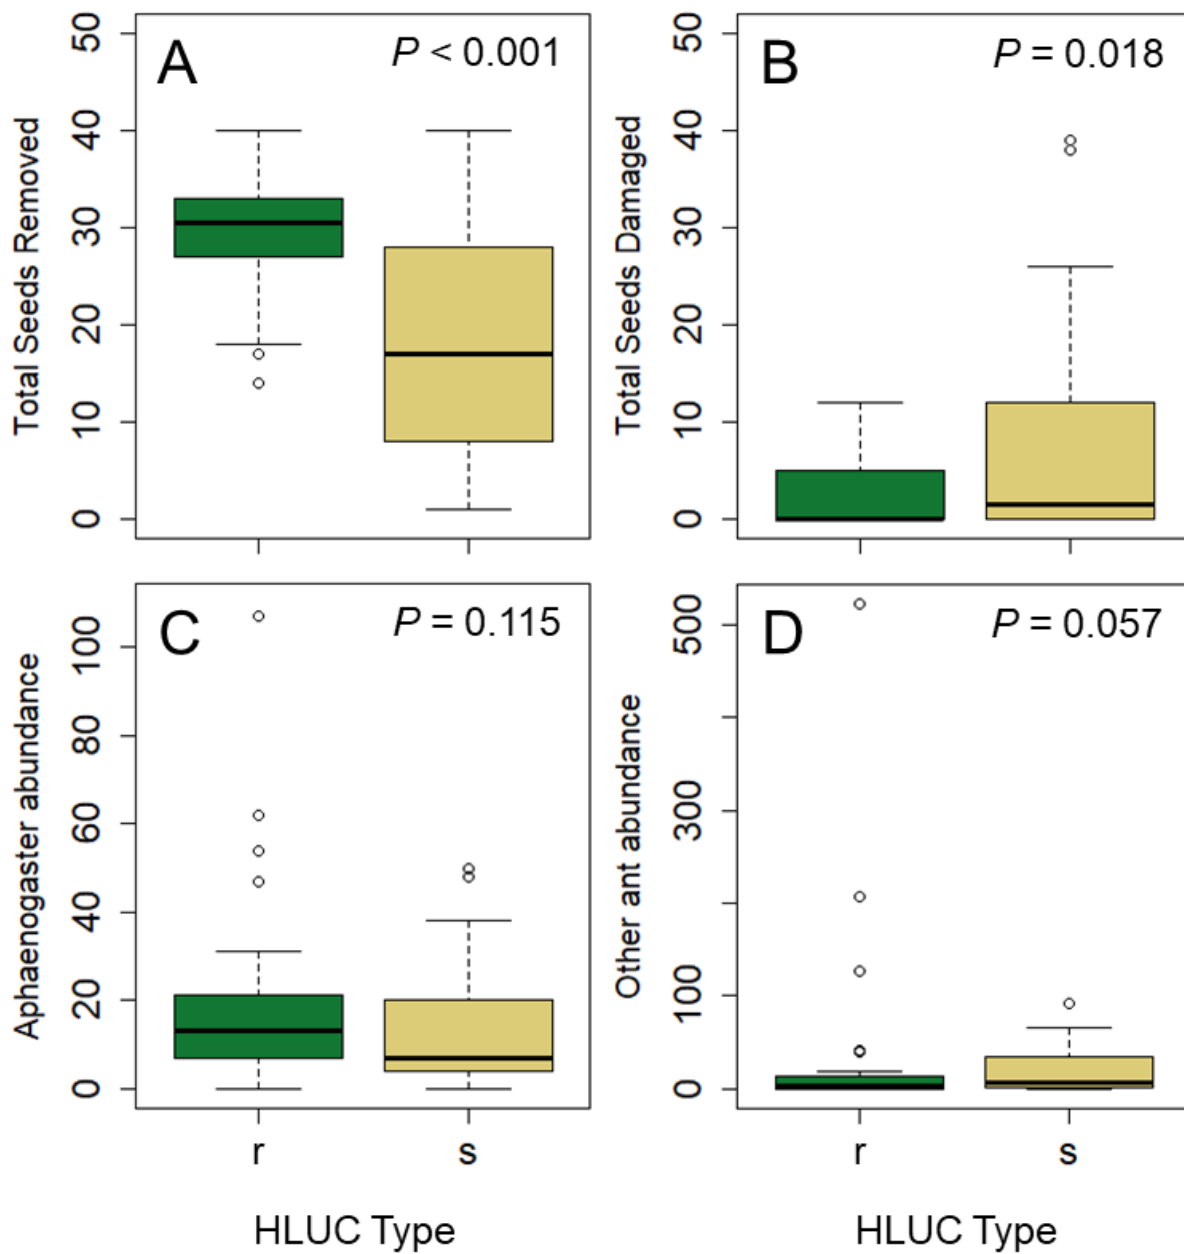

709  
710

711 **Figure 2**

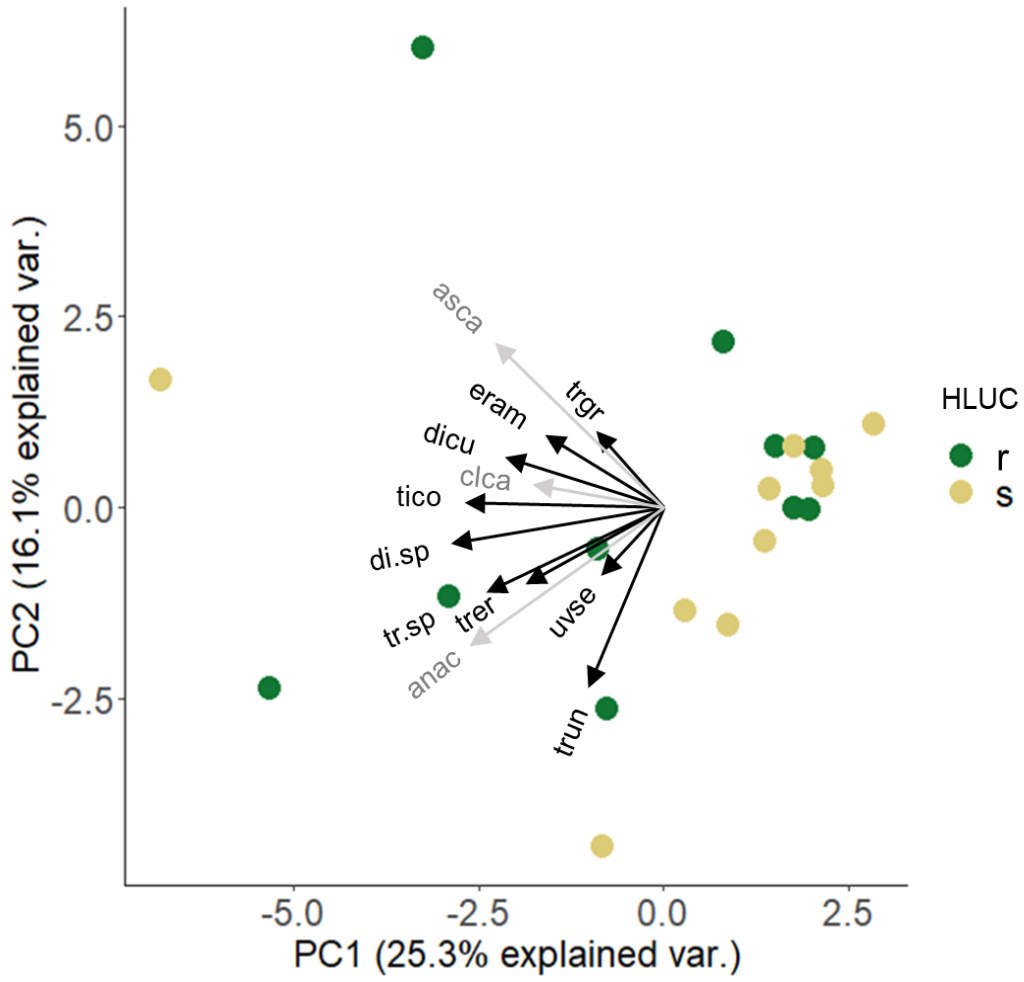

712  
713

714 **Figure 3**

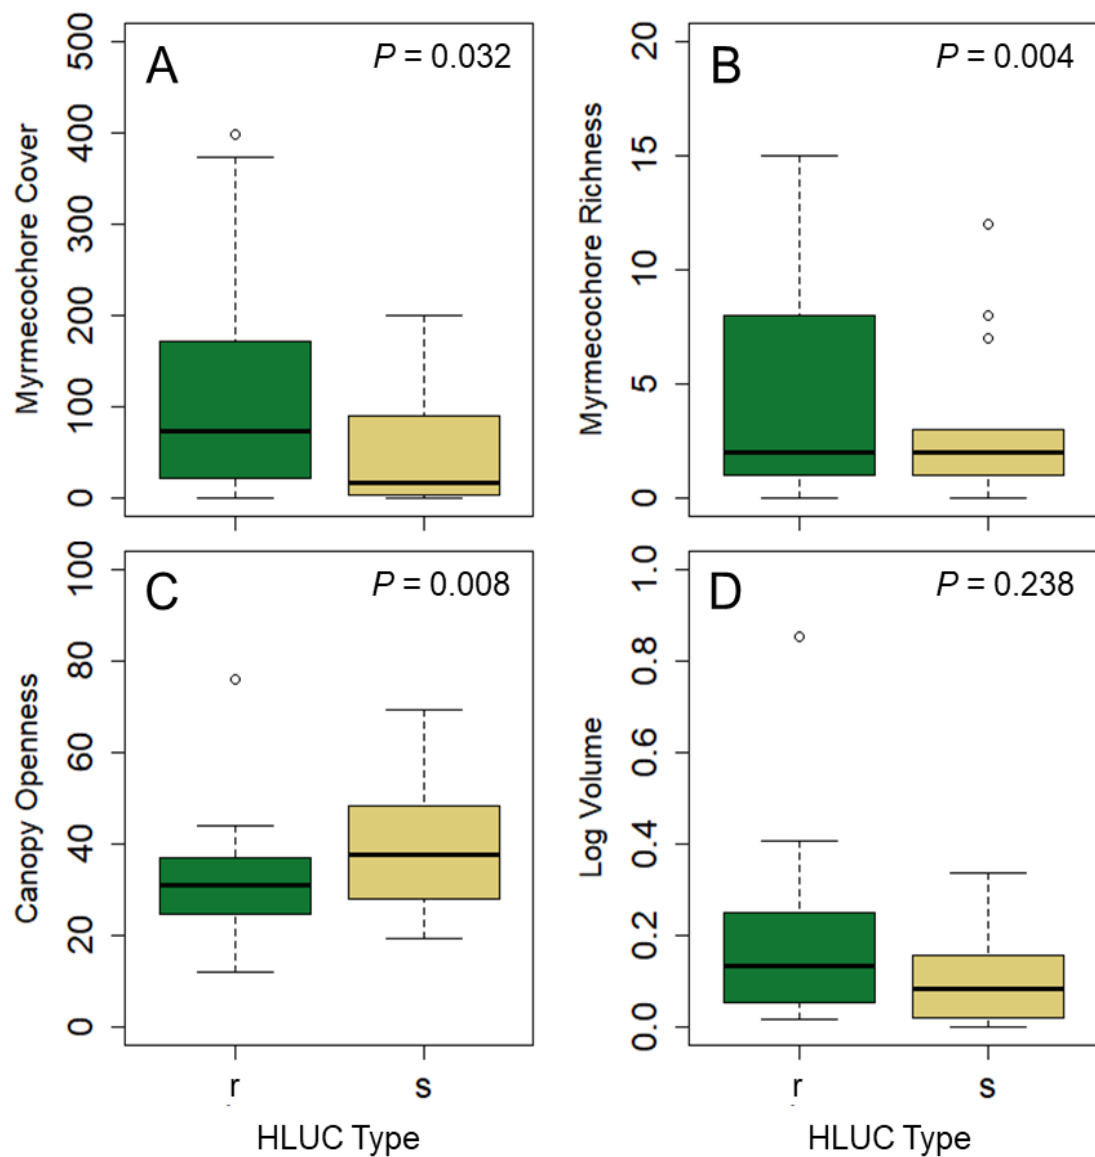

715

716 **Figure 4**

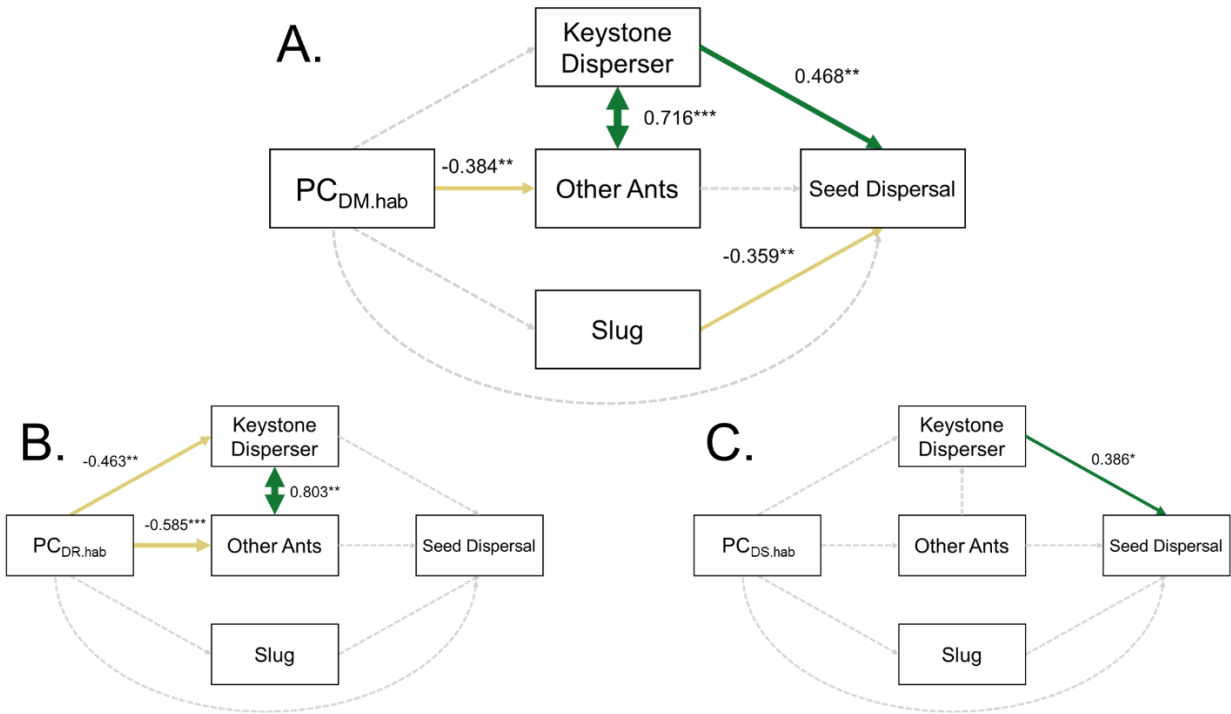

717
